# Supplementary material for: CSF Extracellular Vesicle Aβ42 and Tau/Aβ42 Ratio Are Associated with Cognitive Impairment in Older People with HIV
Source: MDPI journal article supplement (doi:10.3390/v16010072), 2023-12-31
Supplement: s1 [file s1]

**Supplemental Table 1.** Cognitive domain T scores by HAND status

|                                 | <b>All HIV+<br/>(n=98)</b> | <b>No HAND<br/>(n=47)</b> | <b>HAND<br/>(n=51)</b> | <b>P-value</b>   |
|---------------------------------|----------------------------|---------------------------|------------------------|------------------|
| Domain T score                  |                            |                           |                        |                  |
| Abstraction/Executive function  | 51 [44, 59]                | 58 [52, 62]               | 45 [41, 51]            | <b>&lt;0.001</b> |
| Speed of information processing | 50 [42, 57]                | 57 [51, 60]               | 42 [36, 50]            | <b>&lt;0.001</b> |
| Attention/Working memory        | 49 [41, 54]                | 52 [50, 58]               | 42 [38, 48]            | <b>&lt;0.001</b> |
| Learning                        | 45 [37, 52]                | 52 [46, 59]               | 39 [32, 43]            | <b>&lt;0.001</b> |
| Memory                          | 45 [36, 53]                | 51 [46, 56]               | 37 [32, 44]            | <b>&lt;0.001</b> |
| Verbal fluency                  | 51 [43, 58]                | 57 [51, 60]               | 43 [39, 51]            | <b>&lt;0.001</b> |
| Motor                           | 45 [36, 52]                | 50 [44, 57]               | 36 [31, 47]            | <b>&lt;0.001</b> |
| Domain T score < 40 (n, %)      |                            |                           |                        |                  |
| Abstraction/Executive function  | 14 (14)                    | 2 (4)                     | 12 (24)                | <b>0.017</b>     |
| Speed of information processing | 21 (22)                    | 0 (0)                     | 21 (41)                | <b>&lt;0.001</b> |
| Attention/Working memory        | 20 (20)                    | 1 (2)                     | 19 (37)                | <b>&lt;0.001</b> |
| Learning                        | 35 (36)                    | 4 (9)                     | 31 (61)                | <b>&lt;0.001</b> |
| Memory                          | 35 (36)                    | 4 (9)                     | 31 (61)                | <b>&lt;0.001</b> |
| Verbal fluency                  | 19 (19)                    | 2 (4)                     | 17 (33)                | <b>&lt;0.001</b> |
| Motor                           | 38 (39)                    | 5 (11)                    | 33 (65)                | <b>&lt;0.001</b> |

Medians (interquartile range) are shown unless otherwise indicated. P-values for binary comparisons between HAND vs. no HAND groups were calculated using chi-square or Fisher's exact test for categorical variables and Mann-Whitney U test for continuous variables. Bold font denotes  $p < 0.05$ . HAND, HIV-associated neurocognitive disorders.
